# Supplementary material for: Resistance Training Improves Beta Cell Glucose Sensing and Survival in Diabetic Models
Source: MDPI journal article supplement (doi:10.3390/ijms23169427), 2022-08-21
Supplement: s1 [file s1]

Supplementary Material

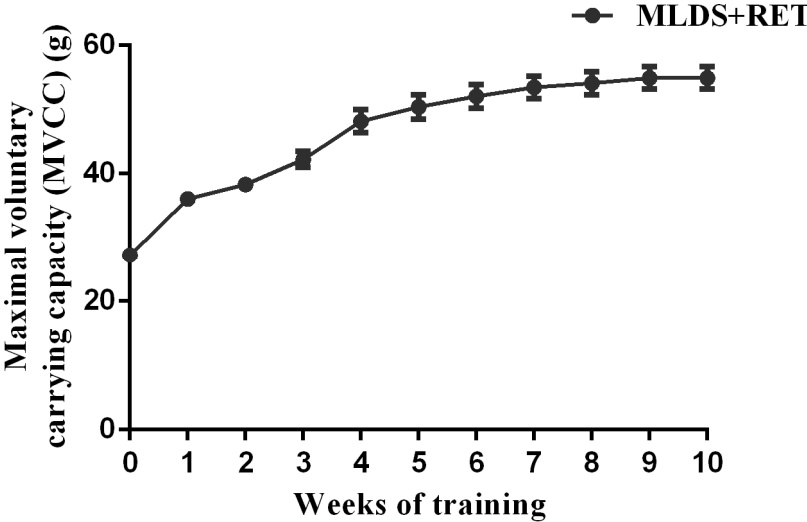

**Figure S1.** Maximal carrying load per week over the course of 10 weeks of the training program from MLDS+RET mice (n=13). Data are the mean  $\pm$  SEM.

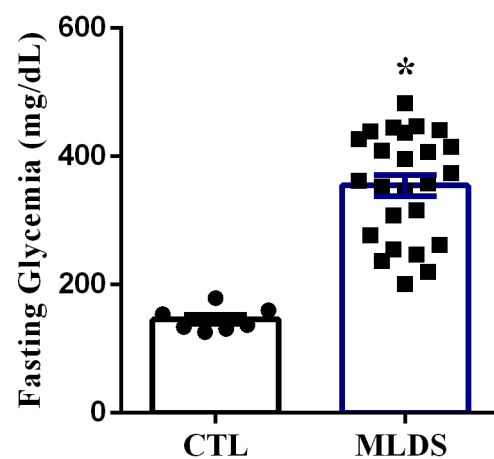

**Figure S2.** Fasting glycemia of CTL (n=7) and MLDS (n=25) mice, twelve days after the last streptozotocin administration. Data are the mean  $\pm$  SEM. (\*) Indicate statistical difference between groups,  $P \leq 0.05$  (Student's T test).

**Table S1.** Final characterization of Control (CON n=6-7) and Resistance exercise training (RET n=6-7) mice. (\*) Indicate statistic difference between groups. Data are presented as the mean  $\pm$  SEM (Student's T test).

|                                                       | CON                | RET                 |
|-------------------------------------------------------|--------------------|---------------------|
| <b>Maximal voluntary carrying capacity (MVCC) (g)</b> | 42.63 $\pm$ 2.01   | 68.34 $\pm$ 1.60*   |
| <b>Body weight (g)</b>                                | 30.99 $\pm$ 1.36   | 26.57 $\pm$ 1.06*   |
| <b>Gastrocnemius (% body weight)</b>                  | 0.9157 $\pm$ 0.02  | 1.010 $\pm$ 0.01*   |
| <b>Soleus (% body weight)</b>                         | 0.1483 $\pm$ 0.007 | 0.1950 $\pm$ 0.007* |

**Table S2.** Primer sequences for real-time qPCR assays.

| Gene         | Forward (5' – 3')       | Reverse (3' – 5')      |
|--------------|-------------------------|------------------------|
| <b>GLUT2</b> | AGGTGACTGGGTCTCATTGGTG  | CCTTCTTAACCAAGGCTGCGT  |
| <b>GCK</b>   | AGAAGCACCGACTGTGACTG    | TGCTGAGCTGTGAGGAACTG   |
| <b>HPRT</b>  | TCCTCATGGACTGATTATGGACA | TAATCCAGCAGGTCAGCAAAGA |

GLUT2: Glucose transporter 2; GCK: Glucokinase; HPRT: Hypoxanthine-guanine phosphoribosyltransferase.
